# Supplementary material for: Core-Hole Excitation Spectra of the Oxides and Hydrates of Fullerene C60 and Azafullerene C59N
Source: MDPI journal article supplement (doi:10.3390/molecules29030609), 2024-01-26
Supplement: s1 [file s1]

# Core-hole excitation spectra of the oxides and reactions involving water of fullerene C<sub>60</sub> and azafullerene C<sub>59</sub>N

Xiong Li <sup>1,2</sup>, Shuyi Wang <sup>1,3</sup>, Jingdong Guo <sup>3</sup>, Ziyi Wu <sup>4</sup>, Changrui Guo <sup>4</sup>, Shaohong Cai <sup>4,5</sup>, \*,  
Mingsen Deng <sup>4</sup>, \*

1 College of Big Data and Information Engineering, Guizhou University, Guiyang 550025, China

2 School of Science, East China University of Technology, Nanchang 330013, China

3 Guizhou Provincial Key Laboratory of Computational Nano-material Science, Guizhou Education University, Guiyang 550018, China

4 School of Information, Guizhou University of Finance and Economics, Guiyang 550025, China

5 Moutai Institute, Renhuai 564507, China

\* Corresponding author: msdeng@mail.gufe.edu.cn (Mingsen Deng), caish@mail.gufe.edu.cn (Shaohong Cai)

## Contents:

- Figure S1: The HOMOs and LUMOs of the fullerene C<sub>60</sub>, aza[60]fullerene, their oxides, and reactions involving H<sub>2</sub>O calculated at B3LYP/6-311+G\* level. The carbon atoms C<sub>1</sub> and C<sub>1'</sub>, C<sub>2</sub> and C<sub>2'</sub>, C<sub>3</sub> and C<sub>3'</sub>, C<sub>4</sub> and C<sub>4'</sub>, which were connected to the oxygen atom, were symmetrically equivalent.
- Table S1: MO transitions and the corresponding energies for peak or shoulder A in the nitrogen K-edge NEXAFS of the C<sub>59</sub>N, C<sub>59</sub>N(OH), (C<sub>59</sub>N)<sub>2</sub>, and C<sub>59</sub>N-O-C<sub>59</sub>N molecules.
- Table S2: MO transitions and the corresponding energies for peak A in the oxygen K-edge XES of the open [5,6] and closed [6,6] isomers of C<sub>60</sub>O, C<sub>59</sub>N(OH), and C<sub>59</sub>N-O-C<sub>59</sub>N molecules.
- Table S3: Assignments of the nitrogen K-edge XPS shake-up satellites of the C<sub>59</sub>N, C<sub>59</sub>N(OH), (C<sub>59</sub>N)<sub>2</sub>, and C<sub>59</sub>N-O-C<sub>59</sub>N molecules.
- Table S4: Assignments of the oxygen K-edge XPS shake-up satellites of the open [5,6] and closed [6,6] isomers of C<sub>60</sub>O, C<sub>60</sub>H(OH), C<sub>60</sub>-O-C<sub>60</sub>, C<sub>60</sub>H-O-C<sub>60</sub>H, C<sub>59</sub>N(OH), and C<sub>59</sub>N-O-C<sub>59</sub>N molecules.
- Table S5: The lowest frequencies of all optimized structures.
- Table S6: The energies of the fullerene C<sub>60</sub>, aza[60]fullerene C<sub>59</sub>N, their oxides, and hydrates molecules at different spin multiplicities.
- Table S7: Molecules Coordinate of the open [5,6] and closed [6,6] isomers of C<sub>60</sub>O, C<sub>60</sub>H(OH), C<sub>60</sub>-O-C<sub>60</sub>, C<sub>60</sub>H-O-C<sub>60</sub>H, C<sub>59</sub>N(OH), and C<sub>59</sub>N-O-C<sub>59</sub>N molecules.

## A. Supplementary Figures

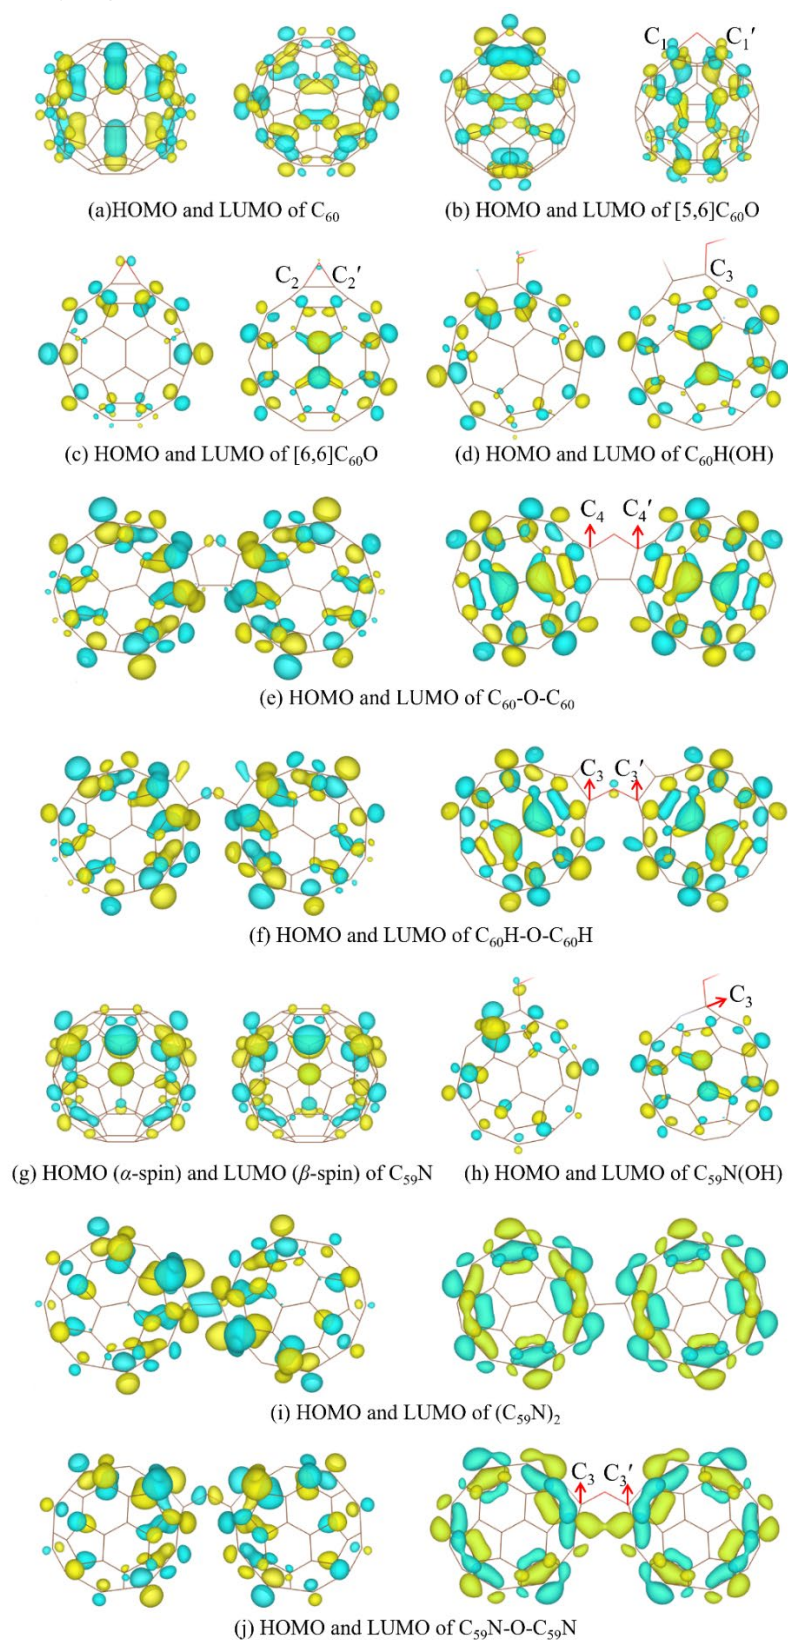

Figure S1. The HOMOs and LUMOs of the fullerene  $C_{60}$ , aza[60]fullerene, their oxides, and reactions involving  $H_2O$  calculated at B3LYP/6-311+G\* level. The carbon atoms  $C_1$  and  $C_1'$ ,  $C_2$  and  $C_2'$ ,  $C_3$  and  $C_3'$ ,  $C_4$  and  $C_4'$ , which were connected to the oxygen atom, were symmetrically equivalent.

## B. Supplementary Tables

Table S1. MO transitions and the corresponding energies for peak or shoulder A in the nitrogen *K*-edge NEXAFS of the C<sub>59</sub>N, C<sub>59</sub>N(OH), (C<sub>59</sub>N)<sub>2</sub>, and C<sub>59</sub>N-O-C<sub>59</sub>N molecules.

| Molecule                              | MO transition of peak (shoulder) A | Energy of peak (shoulder) A (eV) |
|---------------------------------------|------------------------------------|----------------------------------|
| C <sub>59</sub> N                     | 1s → LUMO ( $\beta$ spin)          | 399.96                           |
| C <sub>59</sub> N(OH)                 | 1s → LUMO                          | 399.97                           |
| (C <sub>59</sub> N) <sub>2</sub>      | 1s → LUMO                          | 399.94                           |
| C <sub>59</sub> N-O-C <sub>59</sub> N | 1s → LUMO                          | 399.95                           |

Table S2. MO transitions and the corresponding energies for peak A in the oxygen *K*-edge XES of the open [5,6] and closed [6,6] isomers of C<sub>60</sub>O, C<sub>59</sub>N(OH), and C<sub>59</sub>N-O-C<sub>59</sub>N molecules.

| Molecule                              | MO transition of peak A | Energy of peak A (eV) |
|---------------------------------------|-------------------------|-----------------------|
| [5,6]C <sub>60</sub> O                | HOMO → 1s               | 515.88                |
| [6,6]C <sub>60</sub> O                | HOMO → 1s               | 515.82                |
| C <sub>59</sub> N(OH)                 | HOMO → 1s               | 515.33                |
| C <sub>59</sub> N-O-C <sub>59</sub> N | HOMO → 1s               | 515.74                |

Table S3. Assignments of the nitrogen *K*-edge XPS shake-up satellites of the C<sub>59</sub>N, C<sub>59</sub>N(OH), (C<sub>59</sub>N)<sub>2</sub>, and C<sub>59</sub>N-O-C<sub>59</sub>N molecules.

| Molecule                              | A                                   | B                                                         |
|---------------------------------------|-------------------------------------|-----------------------------------------------------------|
| C <sub>59</sub> N                     | HOMO → LUMO+ 2( $\alpha$ )          | HOMO- 5 → LUMO+ 2( $\alpha$ )                             |
| C <sub>59</sub> N(OH)                 | HOMO → LUMO+ 2                      | HOMO → LUMO+ 6<br>HOMO-5 → LUMO+ 2<br>HOMO-4 → LUMO+ 4    |
| (C <sub>59</sub> N) <sub>2</sub>      | HOMO → LUMO+ 9<br>HOMO -5 → LUMO+ 2 | HOMO- 6 → LUMO+ 8<br>HOMO- 18 → LUMO+ 2                   |
| C <sub>59</sub> N-O-C <sub>59</sub> N | HOMO → LUMO+ 6<br>HOMO-9 → LUMO     | HOMO-6 → LUMO+ 8<br>HOMO-9 → LUMO+ 2<br>HOMO-12 → LUMO+ 6 |

Table S4. Assignments of the oxygen *K*-edge XPS shake-up satellites of the open [5,6] and closed [6,6] isomers of C<sub>60</sub>O, C<sub>60</sub>H(OH), C<sub>60</sub>-O-C<sub>60</sub>, C<sub>60</sub>H-O-C<sub>60</sub>H, C<sub>59</sub>N(OH), and C<sub>59</sub>N-O-C<sub>59</sub>N molecules.

| Molecule                              | A                                                         | B                                      | C                                            |
|---------------------------------------|-----------------------------------------------------------|----------------------------------------|----------------------------------------------|
| [5,6]C <sub>60</sub> O                | HOMO - 3 → LUMO + 1<br>HOMO - 4 → LUMO                    | —                                      | HOMO - 9 → LUMO + 1<br>HOMO - 8 → LUMO + 1   |
| [6,6]C <sub>60</sub> O                | HOMO - 4 → LUMO                                           | HOMO - 4 → LUMO + 3                    | HOMO - 8 → LUMO + 2                          |
| C <sub>60</sub> H(OH)                 | HOMO → LUMO                                               | HOMO - 4 → LUMO                        | HOMO - 5 → LUMO                              |
| C <sub>60</sub> -O-C <sub>60</sub>    | HOMO - 2 → LUMO + 3<br>HOMO → LUMO + 5<br>HOMO - 8 → LUMO | HOMO - 12 → LUMO                       | HOMO - 12 → LUMO + 3<br>HOMO - 10 → LUMO + 5 |
| C <sub>60</sub> H-O-C <sub>60</sub> H | HOMO - 4 → LUMO                                           | HOMO - 5 → LUMO + 4<br>HOMO → LUMO + 5 | HOMO - 12 → LUMO                             |
| C <sub>59</sub> N(OH)                 | HOMO → LUMO                                               | —                                      | HOMO - 5 → LUMO                              |
| C <sub>59</sub> N-O-                  | HOMO - 2 → LUMO + 1                                       | —                                      | HOMO - 11 → LUMO + 3                         |
| C <sub>59</sub> N                     | HOMO - 2 → LUMO + 3<br>HOMO → LUMO + 5                    |                                        | HOMO - 10 → LUMO + 5                         |

Table S5. The lowest frequencies of all optimized structures.

| Molecule                              | lowest (1)<br>(cm <sup>-1</sup> ) | lowest (2)<br>(cm <sup>-1</sup> ) | lowest (3)<br>(cm <sup>-1</sup> ) | lowest (4)<br>(cm <sup>-1</sup> ) | lowest (5)<br>(cm <sup>-1</sup> ) |
|---------------------------------------|-----------------------------------|-----------------------------------|-----------------------------------|-----------------------------------|-----------------------------------|
| C <sub>60</sub>                       | 264.6337                          | 264.6340                          | 264.6345                          | 264.6350                          | 264.6355                          |
| [5,6]C <sub>60</sub> O                | 240.0953                          | 241.8540                          | 264.1200                          | 266.9012                          | 268.6820                          |
| [6,6]C <sub>60</sub> O                | 257.8139                          | 258.6538                          | 258.8951                          | 266.2602                          | 267.5548                          |
| C <sub>60</sub> H(OH)                 | 191.7129                          | 242.1027                          | 252.0298                          | 255.4117                          | 262.1784                          |
| C <sub>60</sub> -O-C <sub>60</sub>    | 14.6776                           | 15.8952                           | 36.8433                           | 94.9132                           | 112.9805                          |
| C <sub>60</sub> H-O-C <sub>60</sub> H | 3.0406                            | 12.6583                           | 25.2719                           | 64.5702                           | 84.2552                           |
| C <sub>59</sub> N                     | 257.8487                          | 261.8285                          | 262.6928                          | 265.9646                          | 268.9307                          |
| C <sub>59</sub> N(OH)                 | 181.7198                          | 229.4904                          | 251.5736                          | 259.2045                          | 260.5026                          |
| (C <sub>59</sub> N) <sub>2</sub>      | 3.9451                            | 17.9744                           | 19.1445                           | 75.9561                           | 98.5405                           |
| C <sub>59</sub> N-O-C <sub>59</sub> N | 4.4088                            | 8.8023                            | 20.9036                           | 66.7224                           | 77.9017                           |

Table S6. The energies of the fullerene C<sub>60</sub>, aza[60]fullerene C<sub>59</sub>N, their oxides, and hydrates molecules at different spin multiplicities. ΔE are the energy differences between the spin triplet (quartet) state and the spin singlet (doublet) state.

| Molecule                              | singlet (a.u.) | doublet (a.u.) | triplet (a.u.) | quartet (a.u.) | ΔE (eV) |
|---------------------------------------|----------------|----------------|----------------|----------------|---------|
| C <sub>60</sub>                       | -2286.1731     | —              | -2286.1127     | —              | 1.6436  |
| [5,6]C <sub>60</sub> O                | -2361.3595     | —              | -2361.2957     | —              | 1.7338  |
| [6,6]C <sub>60</sub> O                | -2361.3561     | —              | -2361.2929     | —              | 1.5783  |
| C <sub>60</sub> H(OH)                 | -2362.5966     | —              | -2362.5353     | —              | 1.6505  |
| C <sub>60</sub> -O-C <sub>60</sub>    | -4647.5566     | —              | -4647.4891     | —              | 1.8387  |
| C <sub>60</sub> H-O-C <sub>60</sub> H | -4648.7582     | —              | -4648.6925     | —              | 1.7867  |
| C <sub>59</sub> N                     | —              | -2302.7913     | —              | -2302.7265     | 1.7635  |
| C <sub>59</sub> N(OH)                 | -2378.6354     | —              | -2378.5782     | —              | 1.5558  |
| (C <sub>59</sub> N) <sub>2</sub>      | -4605.6333     | —              | -4605.5779     | —              | 1.5088  |
| C <sub>59</sub> N-O-C <sub>59</sub> N | -4680.8402     | —              | -4680.7847     | —              | 1.5120  |

### C. Molecules Coordinate

Table S7. Molecules Coordinate of the open [5,6] and closed [6,6] isomers of C<sub>60</sub>O, C<sub>60</sub>H(OH), C<sub>60</sub>-O-C<sub>60</sub>, C<sub>60</sub>H-O-C<sub>60</sub>H, C<sub>59</sub>N(OH), and C<sub>59</sub>N-O-C<sub>59</sub>N molecules.

| Molecule               | Atom | x         | y         | z         |
|------------------------|------|-----------|-----------|-----------|
| [5,6]C <sub>60</sub> O | C    | 0.338440  | 1.690738  | 3.081764  |
|                        | C    | 1.506536  | 2.104967  | 2.331710  |
|                        | C    | 1.386131  | 2.991251  | 1.249923  |
|                        | C    | 0.102088  | 3.625611  | 1.075475  |
|                        | C    | -1.048578 | 3.028019  | 1.556771  |
|                        | C    | -0.922801 | 2.095162  | 2.640554  |
|                        | C    | 0.537081  | 0.319455  | 3.512067  |
|                        | C    | 1.845100  | -0.107699 | 3.048197  |
|                        | C    | 2.431872  | 0.999020  | 2.311965  |
|                        | C    | 3.182547  | 0.769431  | 1.167156  |
|                        | C    | 2.126932  | 2.718732  | 0.000000  |
|                        | C    | -1.048578 | 3.028019  | -1.556771 |
|                        | C    | -2.189512 | 2.595151  | -0.704174 |
|                        | C    | -2.189512 | 2.595151  | 0.704174  |
|                        | C    | -2.799361 | 1.463057  | 1.406102  |
|                        | C    | -2.023789 | 1.165148  | 2.596567  |
|                        | C    | -1.843772 | -0.144344 | 3.037250  |
|                        | C    | -0.533118 | -0.578374 | 3.497333  |
|                        | C    | 2.040450  | -1.414972 | 2.607661  |
|                        | C    | 0.931778  | -2.353674 | 2.605529  |
|                        | C    | -0.331496 | -1.940865 | 3.038674  |
|                        | C    | -1.519231 | -2.351950 | 2.307090  |
|                        | C    | -2.453044 | -1.239311 | 2.306551  |
|                        | C    | -3.219089 | -0.966885 | 1.174309  |
|                        | C    | -3.399264 | 0.405225  | 0.720641  |
|                        | C    | -3.399264 | 0.405225  | -0.720641 |
|                        | C    | -2.799361 | 1.463057  | -1.406102 |
|                        | C    | 1.386131  | 2.991251  | -1.249923 |
|                        | C    | -0.533118 | -0.578374 | -3.497333 |
|                        | C    | 0.537081  | 0.319455  | -3.512067 |
|                        | C    | 1.845100  | -0.107699 | -3.048197 |
|                        | C    | 2.040450  | -1.414972 | -2.607661 |
|                        | C    | 0.931778  | -2.353674 | -2.605529 |

|                        |   |           |           |           |
|------------------------|---|-----------|-----------|-----------|
| [6,6]C <sub>60</sub> O | C | -1.519231 | -2.351950 | -2.307090 |
|                        | C | -2.453044 | -1.239311 | -2.306551 |
|                        | C | -1.843772 | -0.144344 | -3.037250 |
|                        | C | -2.023789 | 1.165148  | -2.596567 |
|                        | C | -0.922801 | 2.095162  | -2.640554 |
|                        | C | 0.338440  | 1.690738  | -3.081764 |
|                        | C | 2.431872  | 0.999020  | -2.311965 |
|                        | C | 3.182547  | 0.769431  | -1.167156 |
|                        | C | 3.410801  | -0.596500 | -0.723443 |
|                        | C | 2.846282  | -1.665012 | -1.423795 |
|                        | C | 2.243994  | -2.769534 | -0.697436 |
|                        | C | 1.056855  | -3.191213 | -1.425782 |
|                        | C | -0.084218 | -3.587897 | -0.726873 |
|                        | C | -1.397828 | -3.159205 | -1.175562 |
|                        | C | -3.219089 | -0.966885 | -1.174309 |
|                        | C | -3.101086 | -1.813420 | 0.000000  |
|                        | C | -2.208662 | -2.888070 | 0.000000  |
|                        | C | -1.397828 | -3.159205 | 1.175562  |
|                        | C | -0.084218 | -3.587897 | 0.726873  |
|                        | C | 1.056855  | -3.191213 | 1.425782  |
|                        | C | 2.243994  | -2.769534 | 0.697436  |
|                        | C | 2.846282  | -1.665012 | 1.423795  |
|                        | C | 3.410801  | -0.596500 | 0.723443  |
|                        | C | 1.506536  | 2.104967  | -2.331710 |
|                        | C | 3.016505  | 1.624736  | 0.000000  |
|                        | C | -0.331496 | -1.940865 | -3.038674 |
|                        | C | 0.102088  | 3.625611  | -1.075475 |
|                        | O | -0.017544 | 4.491316  | 0.000000  |
|                        | C | -2.299383 | 0.737840  | 2.501362  |
|                        | C | -2.299383 | -0.737840 | 2.501362  |
|                        | C | -1.195160 | -1.452753 | 2.941543  |
|                        | C | 0.000000  | -0.768956 | 3.516743  |
|                        | C | 0.000000  | 0.768956  | 3.516743  |
|                        | C | -1.195160 | 1.452753  | 2.941543  |
|                        | C | -3.017554 | 1.176500  | 1.321292  |
|                        | C | -3.462188 | 0.000000  | 0.593610  |
|                        | C | -3.017554 | -1.176500 | 1.321292  |
|                        | C | -2.594543 | -2.308018 | 0.615257  |
|                        | C | -0.727853 | -2.585895 | 2.183636  |
|                        | C | 2.299383  | -0.737840 | 2.501362  |
|                        | C | 2.299383  | 0.737840  | 2.501362  |
|                        | C | 1.195160  | 1.452753  | 2.941543  |
|                        | C | 0.727853  | 2.585895  | 2.183636  |
|                        | C | -0.727853 | 2.585895  | 2.183636  |
|                        | C | -1.423774 | 3.030322  | 1.056329  |
|                        | C | -2.594543 | 2.308018  | 0.615257  |
|                        | C | -3.471101 | 0.000000  | -0.801034 |
|                        | C | -3.027197 | 1.176309  | -1.532041 |
|                        | C | -2.599344 | 2.308184  | -0.837733 |
|                        | C | -1.425312 | 3.036188  | -1.291663 |
|                        | C | -0.696999 | 3.483982  | -0.118061 |
|                        | C | 0.696999  | 3.483982  | -0.118061 |
|                        | C | 1.423774  | 3.030322  | 1.056329  |
|                        | C | 2.594543  | 2.308018  | 0.615257  |
|                        | C | 3.017554  | 1.176500  | 1.321292  |
|                        | C | 0.727853  | -2.585895 | 2.183636  |
|                        | C | 3.027197  | -1.176309 | -1.532041 |

|                       |   |           |           |           |
|-----------------------|---|-----------|-----------|-----------|
| C <sub>60</sub> H(OH) | C | 2.599344  | -2.308184 | -0.837733 |
|                       | C | 1.425312  | -3.036188 | -1.291663 |
|                       | C | 0.727030  | -2.602801 | -2.420184 |
|                       | C | 1.175662  | -1.425226 | -3.142456 |
|                       | C | 2.304006  | 0.727479  | -2.707408 |
|                       | C | 3.027197  | 1.176309  | -1.532041 |
|                       | C | 3.471101  | 0.000000  | -0.801034 |
|                       | C | 3.462188  | 0.000000  | 0.593610  |
|                       | C | 3.017554  | -1.176500 | 1.321292  |
|                       | C | 2.594543  | -2.308018 | 0.615257  |
|                       | C | 0.696999  | -3.483982 | -0.118061 |
|                       | C | -0.696999 | -3.483982 | -0.118061 |
|                       | C | -1.425312 | -3.036188 | -1.291663 |
|                       | C | -0.727030 | -2.602801 | -2.420184 |
|                       | C | -1.175662 | -1.425226 | -3.142456 |
|                       | C | 0.000000  | -0.697560 | -3.590530 |
|                       | C | 0.000000  | 0.697560  | -3.590530 |
|                       | C | 1.175662  | 1.425226  | -3.142456 |
|                       | C | 2.599344  | 2.308184  | -0.837733 |
|                       | C | 1.425312  | 3.036188  | -1.291663 |
|                       | C | 0.727030  | 2.602801  | -2.420184 |
|                       | C | -0.727030 | 2.602801  | -2.420184 |
|                       | C | -1.175662 | 1.425226  | -3.142456 |
|                       | C | -2.304006 | 0.727479  | -2.707408 |
|                       | C | -2.304006 | -0.727479 | -2.707408 |
|                       | C | -3.027197 | -1.176309 | -1.532041 |
|                       | C | -2.599344 | -2.308184 | -0.837733 |
|                       | C | 1.423774  | -3.030322 | 1.056329  |
|                       | C | -1.423774 | -3.030322 | 1.056329  |
|                       | C | 2.304006  | -0.727479 | -2.707408 |
|                       | C | 1.195160  | -1.452753 | 2.941543  |
|                       | O | 0.000000  | 0.000000  | 4.712202  |
|                       | C | 1.959187  | -2.868579 | 1.175359  |
|                       | C | 2.984529  | -1.943128 | 0.726945  |
|                       | C | 3.204631  | -0.753716 | 1.424780  |
|                       | C | 2.406040  | -0.441584 | 2.599072  |
|                       | C | 1.418756  | -1.332246 | 3.026237  |
|                       | C | 1.193073  | -2.568597 | 2.303818  |
|                       | C | 1.326125  | -3.442389 | 0.000000  |
|                       | C | 1.959187  | -2.868579 | -1.175359 |
|                       | C | 2.984529  | -1.943128 | -0.726945 |
|                       | C | 3.204631  | -0.753716 | -1.424780 |
|                       | C | 3.430167  | 0.482498  | 0.696766  |
|                       | C | 2.140496  | 0.985202  | 2.593355  |
|                       | C | 0.894269  | 1.468369  | 3.006578  |
|                       | C | -0.128878 | 0.539904  | 3.452197  |
|                       | C | 0.127274  | -0.830874 | 3.469488  |
|                       | C | -0.895731 | -1.765427 | 3.027818  |
|                       | C | -0.238126 | -2.835661 | 2.303833  |
|                       | C | -0.844123 | -3.392180 | 1.175445  |
|                       | C | -0.046150 | -3.697659 | 0.000000  |
|                       | C | 1.193073  | -2.568597 | -2.303818 |
|                       | C | -0.238126 | -2.835661 | -2.303833 |
|                       | C | -0.844123 | -3.392180 | -1.175445 |
|                       | C | -2.134382 | -2.899270 | -0.727081 |
|                       | C | -2.134382 | -2.899270 | 0.727081  |
|                       | C | -2.768956 | -1.869844 | 1.424956  |

|                                    |   |           |           |           |
|------------------------------------|---|-----------|-----------|-----------|
|                                    | C | -2.137243 | -1.290598 | 2.599617  |
|                                    | C | -2.407342 | 0.135760  | 2.595620  |
|                                    | C | -1.419042 | 1.037132  | 3.007086  |
|                                    | C | 2.767678  | 1.554062  | 1.424490  |
|                                    | C | 0.857445  | 3.105318  | -1.181648 |
|                                    | C | 0.249499  | 2.541764  | -2.281616 |
|                                    | C | -1.206363 | 2.272558  | -2.286821 |
|                                    | C | -2.954376 | 1.627762  | -0.725941 |
|                                    | C | -2.954376 | 1.627762  | 0.725941  |
|                                    | C | -1.966939 | 2.569648  | 1.177533  |
|                                    | C | -1.206363 | 2.272558  | 2.286821  |
|                                    | C | 0.249499  | 2.541764  | 2.281616  |
|                                    | C | 0.857445  | 3.105318  | 1.181648  |
|                                    | C | 2.115444  | 2.576628  | -0.727616 |
|                                    | C | 2.767678  | 1.554062  | -1.424490 |
|                                    | C | 2.140496  | 0.985202  | -2.593355 |
|                                    | C | 0.894269  | 1.468369  | -3.006578 |
|                                    | C | -0.128878 | 0.539904  | -3.452197 |
|                                    | C | -1.419042 | 1.037132  | -3.007086 |
|                                    | C | -2.407342 | 0.135760  | -2.595620 |
|                                    | C | -3.195513 | 0.439254  | -1.426216 |
|                                    | C | -3.195513 | 0.439254  | 1.426216  |
|                                    | C | -3.425601 | -0.797615 | 0.697184  |
|                                    | C | -3.425601 | -0.797615 | -0.697184 |
|                                    | C | -2.768956 | -1.869844 | -1.424956 |
|                                    | C | -2.137243 | -1.290598 | -2.599617 |
|                                    | C | -0.895731 | -1.765427 | -3.027818 |
|                                    | C | 0.127274  | -0.830874 | -3.469488 |
|                                    | C | 1.418756  | -1.332246 | -3.026237 |
|                                    | C | 2.406040  | -0.441584 | -2.599072 |
|                                    | C | 2.115444  | 2.576628  | 0.727616  |
|                                    | C | 3.430167  | 0.482498  | -0.696766 |
|                                    | C | -1.966939 | 2.569648  | -1.177533 |
|                                    | C | 0.087731  | 3.726303  | 0.000000  |
|                                    | C | -1.461373 | 3.404780  | 0.000000  |
|                                    | O | 0.138785  | 5.159327  | 0.000000  |
|                                    | H | 1.070339  | 5.422345  | 0.000000  |
|                                    | H | -1.929081 | 4.398361  | 0.000000  |
| C <sub>60</sub> -O-C <sub>60</sub> | C | -3.027339 | 5.783460  | -1.516255 |
|                                    | C | -3.470201 | 5.360137  | -0.197051 |
|                                    | C | -3.452647 | 4.007161  | 0.141202  |
|                                    | C | -3.003777 | 3.019341  | -0.824276 |
|                                    | C | -2.594053 | 3.426578  | -2.098015 |
|                                    | C | -2.599787 | 4.835119  | -2.448054 |
|                                    | C | -2.303993 | 7.030374  | -1.364233 |
|                                    | C | -2.304003 | 7.382959  | 0.048395  |
|                                    | C | -3.027535 | 6.353574  | 0.768413  |
|                                    | C | -2.599603 | 5.954122  | 2.036732  |
|                                    | C | -3.009084 | 3.589064  | 1.458438  |
|                                    | C | -2.280394 | 1.987099  | -0.115956 |
|                                    | C | -0.725416 | 1.841425  | -1.974434 |
|                                    | C | -1.424434 | 2.821969  | -2.687411 |
|                                    | C | -0.696801 | 3.850445  | -3.413021 |
|                                    | C | -1.425083 | 5.098418  | -3.263426 |
|                                    | C | -0.727140 | 6.298469  | -3.114667 |
|                                    | C | -1.175442 | 7.283892  | -2.146938 |
|                                    | C | -1.175429 | 7.974346  | 0.620116  |

---

|   |           |           |           |
|---|-----------|-----------|-----------|
| C | 0.000000  | 8.231743  | -0.194411 |
| C | 0.000000  | 7.893824  | -1.548735 |
| C | 1.175442  | 7.283892  | -2.146938 |
| C | 0.727140  | 6.298469  | -3.114667 |
| C | 1.425083  | 5.098418  | -3.263426 |
| C | 0.696801  | 3.850445  | -3.413021 |
| C | 1.424434  | 2.821969  | -2.687411 |
| C | 0.725416  | 1.841425  | -1.974434 |
| C | -2.283599 | 2.345241  | 1.318651  |
| C | 2.283599  | 2.345241  | 1.318651  |
| C | 1.180306  | 2.091820  | 2.099338  |
| C | 0.726826  | 3.089638  | 3.027405  |
| C | 1.424583  | 4.290123  | 3.195816  |
| C | 3.452647  | 4.007161  | 0.141202  |
| C | 3.003777  | 3.019341  | -0.824276 |
| C | 2.280394  | 1.987099  | -0.115956 |
| C | 1.175660  | 1.392817  | -0.684952 |
| C | -0.726826 | 3.089638  | 3.027405  |
| C | -1.424583 | 4.290123  | 3.195816  |
| C | -0.696936 | 5.539323  | 3.352192  |
| C | 0.696936  | 5.539323  | 3.352192  |
| C | 1.424770  | 6.569776  | 2.632702  |
| C | 2.599603  | 5.954122  | 2.036732  |
| C | 3.027535  | 6.353574  | 0.768413  |
| C | 3.470201  | 5.360137  | -0.197051 |
| C | 2.594053  | 3.426578  | -2.098015 |
| C | 2.599787  | 4.835119  | -2.448054 |
| C | 3.027339  | 5.783460  | -1.516255 |
| C | 2.303993  | 7.030374  | -1.364233 |
| C | 2.304003  | 7.382959  | 0.048395  |
| C | 1.175429  | 7.974346  | 0.620116  |
| C | 0.727166  | 7.559653  | 1.937687  |
| C | -0.727166 | 7.559653  | 1.937687  |
| C | -1.424770 | 6.569776  | 2.632702  |
| C | -1.180306 | 2.091820  | 2.099338  |
| C | -2.594832 | 4.546805  | 2.389990  |
| C | 3.009084  | 3.589064  | 1.458438  |
| C | 2.594832  | 4.546805  | 2.389990  |
| C | 0.000000  | 0.808081  | 0.116535  |
| C | 0.000000  | -0.808081 | 0.116535  |
| C | 1.175660  | -1.392817 | -0.684952 |
| C | -1.175660 | -1.392817 | -0.684952 |
| C | 2.280394  | -1.987099 | -0.115956 |
| C | 0.725416  | -1.841425 | -1.974434 |
| C | 1.180306  | -2.091820 | 2.099338  |
| C | -1.180306 | -2.091820 | 2.099338  |
| C | -0.725416 | -1.841425 | -1.974434 |
| C | -2.280394 | -1.987099 | -0.115956 |
| C | 2.283599  | -2.345241 | 1.318651  |
| C | 3.003777  | -3.019341 | -0.824276 |
| C | 1.424434  | -2.821969 | -2.687411 |
| C | 0.726826  | -3.089638 | 3.027405  |
| C | -0.726826 | -3.089638 | 3.027405  |
| C | -2.283599 | -2.345241 | 1.318651  |
| C | -1.424434 | -2.821969 | -2.687411 |
| C | -3.003777 | -3.019341 | -0.824276 |
| C | 3.009084  | -3.589064 | 1.458438  |

---

|                                       |   |           |           |           |
|---------------------------------------|---|-----------|-----------|-----------|
|                                       | C | 3.452647  | -4.007161 | 0.141202  |
|                                       | C | 2.594053  | -3.426578 | -2.098015 |
|                                       | C | 0.696801  | -3.850445 | -3.413021 |
|                                       | C | 1.424583  | -4.290123 | 3.195816  |
|                                       | C | -1.424583 | -4.290123 | 3.195816  |
|                                       | C | -3.009084 | -3.589064 | 1.458438  |
|                                       | C | -2.594053 | -3.426578 | -2.098015 |
|                                       | C | -0.696801 | -3.850445 | -3.413021 |
|                                       | C | -3.452647 | -4.007161 | 0.141202  |
|                                       | C | 2.594832  | -4.546805 | 2.389990  |
|                                       | C | 3.470201  | -5.360137 | -0.197051 |
|                                       | C | 2.599787  | -4.835119 | -2.448054 |
|                                       | C | 1.425083  | -5.098418 | -3.263426 |
|                                       | C | 0.696936  | -5.539323 | 3.352192  |
|                                       | C | -2.594832 | -4.546805 | 2.389990  |
|                                       | C | -0.696936 | -5.539323 | 3.352192  |
|                                       | C | -2.599787 | -4.835119 | -2.448054 |
|                                       | C | -1.425083 | -5.098418 | -3.263426 |
|                                       | C | -3.470201 | -5.360137 | -0.197051 |
|                                       | C | 2.599603  | -5.954122 | 2.036732  |
|                                       | C | 3.027535  | -6.353574 | 0.768413  |
|                                       | C | 3.027339  | -5.783460 | -1.516255 |
|                                       | C | 0.727140  | -6.298469 | -3.114667 |
|                                       | C | 1.424770  | -6.569776 | 2.632702  |
|                                       | C | -2.599603 | -5.954122 | 2.036732  |
|                                       | C | -1.424770 | -6.569776 | 2.632702  |
|                                       | C | -3.027339 | -5.783460 | -1.516255 |
|                                       | C | -0.727140 | -6.298469 | -3.114667 |
|                                       | C | -3.027535 | -6.353574 | 0.768413  |
|                                       | C | 2.304003  | -7.382959 | 0.048395  |
|                                       | C | 2.303993  | -7.030374 | -1.364233 |
|                                       | C | 1.175442  | -7.283892 | -2.146938 |
|                                       | C | 0.727166  | -7.559653 | 1.937687  |
|                                       | C | -0.727166 | -7.559653 | 1.937687  |
|                                       | C | -2.303993 | -7.030374 | -1.364233 |
|                                       | C | -1.175442 | -7.283892 | -2.146938 |
|                                       | C | -2.304003 | -7.382959 | 0.048395  |
|                                       | C | 1.175429  | -7.974346 | 0.620116  |
|                                       | C | 0.000000  | -7.893824 | -1.548735 |
|                                       | C | -1.175429 | -7.974346 | 0.620116  |
|                                       | C | 0.000000  | -8.231743 | -0.194411 |
|                                       | C | 0.000000  | 1.210811  | 1.657056  |
|                                       | C | 0.000000  | -1.210811 | 1.657056  |
|                                       | C | -1.175660 | 1.392817  | -0.684952 |
|                                       | O | 0.000000  | 0.000000  | 2.419174  |
| C <sub>60</sub> H-O-C <sub>60</sub> H | C | 1.175557  | -6.638021 | -2.910960 |
|                                       | C | 0.727085  | -5.382844 | -3.487466 |
|                                       | C | 1.424959  | -4.203501 | -3.219000 |
|                                       | C | 2.599094  | -4.232198 | -2.361661 |
|                                       | C | 3.026350  | -5.440206 | -1.806892 |
|                                       | C | 2.304251  | -6.665347 | -2.088695 |
|                                       | C | 0.000000  | -7.415091 | -2.556139 |
|                                       | C | -1.175557 | -6.638021 | -2.910960 |
|                                       | C | -0.727085 | -5.382844 | -3.487466 |
|                                       | C | -1.424959 | -4.203501 | -3.219000 |
|                                       | C | 0.696628  | -2.979543 | -2.936838 |
|                                       | C | 2.591060  | -3.027450 | -1.552432 |

---

|   |           |           |           |
|---|-----------|-----------|-----------|
| C | 3.002086  | -3.073574 | -0.216978 |
| C | 3.450222  | -4.330414 | 0.354431  |
| C | 3.469273  | -5.489004 | -0.422458 |
| C | 3.028063  | -6.751929 | 0.147724  |
| C | 2.303968  | -7.475652 | -0.879397 |
| C | 1.175483  | -8.226181 | -0.542667 |
| C | 0.000000  | -8.191546 | -1.396288 |
| C | -2.304251 | -6.665347 | -2.088695 |
| C | -2.303968 | -7.475652 | -0.879397 |
| C | -1.175483 | -8.226181 | -0.542667 |
| C | -0.727103 | -8.283050 | 0.837309  |
| C | 0.727103  | -8.283050 | 0.837309  |
| C | 1.425377  | -7.588975 | 1.827096  |
| C | 2.599983  | -6.806704 | 1.475620  |
| C | 2.595971  | -5.602968 | 2.287024  |
| C | 3.007310  | -4.383928 | 1.735844  |
| C | 1.421635  | -2.258829 | -1.903088 |
| C | -1.184188 | -1.566357 | 0.464068  |
| C | -2.277855 | -2.338468 | 0.799920  |
| C | -2.287350 | -3.163703 | 2.028575  |
| C | -0.725653 | -4.451476 | 3.377742  |
| C | 0.725653  | -4.451476 | 3.377742  |
| C | 1.176494  | -3.197289 | 2.840374  |
| C | 2.287350  | -3.163703 | 2.028575  |
| C | 2.277855  | -2.338468 | 0.799920  |
| C | 1.184188  | -1.566357 | 0.464068  |
| C | -0.725797 | -1.579184 | -0.900071 |
| C | -1.421635 | -2.258829 | -1.903088 |
| C | -2.591060 | -3.027450 | -1.552432 |
| C | -3.002086 | -3.073574 | -0.216978 |
| C | -3.450222 | -4.330414 | 0.354431  |
| C | -3.007310 | -4.383928 | 1.735844  |
| C | -2.595971 | -5.602968 | 2.287024  |
| C | -1.426534 | -5.637591 | 3.131397  |
| C | 1.426534  | -5.637591 | 3.131397  |
| C | 0.697434  | -6.864577 | 2.854463  |
| C | -0.697434 | -6.864577 | 2.854463  |
| C | -1.425377 | -7.588975 | 1.827096  |
| C | -2.599983 | -6.806704 | 1.475620  |
| C | -3.028063 | -6.751929 | 0.147724  |
| C | -3.469273 | -5.489004 | -0.422458 |
| C | -3.026350 | -5.440206 | -1.806892 |
| C | -2.599094 | -4.232198 | -2.361661 |
| C | -0.696628 | -2.979543 | -2.936838 |
| C | -1.176494 | -3.197289 | 2.840374  |
| C | 1.184188  | 1.566357  | 0.464068  |
| C | -1.184188 | 1.566357  | 0.464068  |
| C | 2.277855  | 2.338468  | 0.799920  |
| C | 0.725797  | 1.579184  | -0.900071 |
| C | 1.176494  | 3.197289  | 2.840374  |
| C | -1.176494 | 3.197289  | 2.840374  |
| C | -2.277855 | 2.338468  | 0.799920  |
| C | 2.287350  | 3.163703  | 2.028575  |
| C | 3.002086  | 3.073574  | -0.216978 |
| C | 1.421635  | 2.258829  | -1.903088 |
| C | 0.725653  | 4.451476  | 3.377742  |
| C | -0.725653 | 4.451476  | 3.377742  |

---

|                       |   |           |           |           |
|-----------------------|---|-----------|-----------|-----------|
|                       | C | -2.287350 | 3.163703  | 2.028575  |
|                       | C | -1.421635 | 2.258829  | -1.903088 |
|                       | C | -3.002086 | 3.073574  | -0.216978 |
|                       | C | 3.007310  | 4.383928  | 1.735844  |
|                       | C | 3.450222  | 4.330414  | 0.354431  |
|                       | C | 2.591060  | 3.027450  | -1.552432 |
|                       | C | 0.696628  | 2.979543  | -2.936838 |
|                       | C | 1.426534  | 5.637591  | 3.131397  |
|                       | C | -1.426534 | 5.637591  | 3.131397  |
|                       | C | -3.007310 | 4.383928  | 1.735844  |
|                       | C | -2.591060 | 3.027450  | -1.552432 |
|                       | C | -0.696628 | 2.979543  | -2.936838 |
|                       | C | -3.450222 | 4.330414  | 0.354431  |
|                       | C | 2.595971  | 5.602968  | 2.287024  |
|                       | C | 3.469273  | 5.489004  | -0.422458 |
|                       | C | 2.599094  | 4.232198  | -2.361661 |
|                       | C | 1.424959  | 4.203501  | -3.219000 |
|                       | C | 0.697434  | 6.864577  | 2.854463  |
|                       | C | -2.595971 | 5.602968  | 2.287024  |
|                       | C | -0.697434 | 6.864577  | 2.854463  |
|                       | C | -2.599094 | 4.232198  | -2.361661 |
|                       | C | -1.424959 | 4.203501  | -3.219000 |
|                       | C | -3.469273 | 5.489004  | -0.422458 |
|                       | C | 2.599983  | 6.806704  | 1.475620  |
|                       | C | 3.028063  | 6.751929  | 0.147724  |
|                       | C | 3.026350  | 5.440206  | -1.806892 |
|                       | C | 0.727085  | 5.382844  | -3.487466 |
|                       | C | 1.425377  | 7.588975  | 1.827096  |
|                       | C | -2.599983 | 6.806704  | 1.475620  |
|                       | C | -1.425377 | 7.588975  | 1.827096  |
|                       | C | -3.026350 | 5.440206  | -1.806892 |
|                       | C | -0.727085 | 5.382844  | -3.487466 |
|                       | C | -3.028063 | 6.751929  | 0.147724  |
|                       | C | 2.303968  | 7.475652  | -0.879397 |
|                       | C | 2.304251  | 6.665347  | -2.088695 |
|                       | C | 1.175557  | 6.638021  | -2.910960 |
|                       | C | 0.727103  | 8.283050  | 0.837309  |
|                       | C | -0.727103 | 8.283050  | 0.837309  |
|                       | C | -2.304251 | 6.665347  | -2.088695 |
|                       | C | -1.175557 | 6.638021  | -2.910960 |
|                       | C | -2.303968 | 7.475652  | -0.879397 |
|                       | C | 1.175483  | 8.226181  | -0.542667 |
|                       | C | 0.000000  | 7.415091  | -2.556139 |
|                       | C | -1.175483 | 8.226181  | -0.542667 |
|                       | C | 0.000000  | 8.191546  | -1.396288 |
|                       | C | -0.725797 | 1.579184  | -0.900071 |
|                       | C | 0.725797  | -1.579184 | -0.900071 |
|                       | C | 0.000000  | 1.296911  | 1.416511  |
|                       | C | 0.000000  | -1.296911 | 1.416511  |
|                       | C | 0.000000  | -2.235194 | 2.706054  |
|                       | C | 0.000000  | 2.235194  | 2.706054  |
|                       | O | 0.000000  | 0.000000  | 2.061802  |
|                       | H | 0.000000  | -1.518373 | 3.536137  |
|                       | H | 0.000000  | 1.518373  | 3.536137  |
| C <sub>59</sub> N(OH) | C | 1.950493  | -2.861800 | 1.175510  |
|                       | C | 2.978653  | -1.939400 | 0.726807  |
|                       | C | 3.202400  | -0.750728 | 1.424539  |

|   |           |           |           |
|---|-----------|-----------|-----------|
| C | 2.406560  | -0.437732 | 2.600656  |
| C | 1.414477  | -1.323550 | 3.026408  |
| C | 1.185865  | -2.560365 | 2.304715  |
| C | 1.317582  | -3.435377 | 0.000000  |
| C | 1.950493  | -2.861800 | -1.175510 |
| C | 2.978653  | -1.939400 | -0.726807 |
| C | 3.202400  | -0.750728 | -1.424539 |
| C | 3.429934  | 0.484919  | 0.696365  |
| C | 2.145009  | 0.989485  | 2.597471  |
| C | 0.904003  | 1.473858  | 3.021294  |
| C | -0.125606 | 0.554696  | 3.466098  |
| C | 0.124168  | -0.818265 | 3.472870  |
| C | -0.901067 | -1.750409 | 3.032705  |
| C | -0.245787 | -2.820940 | 2.304117  |
| C | -0.852662 | -3.374851 | 1.175685  |
| C | -0.056045 | -3.682622 | 0.000000  |
| C | 1.185865  | -2.560365 | -2.304715 |
| C | -0.245787 | -2.820940 | -2.304117 |
| C | -0.852662 | -3.374851 | -1.175685 |
| C | -2.140902 | -2.875147 | -0.727487 |
| C | -2.140902 | -2.875147 | 0.727487  |
| C | -2.772748 | -1.846639 | 1.427216  |
| C | -2.138533 | -1.268606 | 2.603002  |
| C | -2.408712 | 0.158218  | 2.605925  |
| C | -1.416597 | 1.061986  | 3.017091  |
| C | 2.768458  | 1.558582  | 1.425441  |
| C | 0.859717  | 3.107802  | -1.186114 |
| C | 0.261071  | 2.545525  | -2.291563 |
| C | -1.182228 | 2.295654  | -2.302393 |
| C | -2.937743 | 1.636386  | -0.717066 |
| C | -2.937743 | 1.636386  | 0.717066  |
| C | -1.894269 | 2.530191  | 1.136309  |
| C | -1.182228 | 2.295654  | 2.302393  |
| C | 0.261071  | 2.545525  | 2.291563  |
| C | 0.859717  | 3.107802  | 1.186114  |
| C | 2.115132  | 2.578600  | -0.726386 |
| C | 2.768458  | 1.558582  | -1.425441 |
| C | 2.145009  | 0.989485  | -2.597471 |
| C | 0.904003  | 1.473858  | -3.021294 |
| C | -0.125606 | 0.554696  | -3.466098 |
| C | -1.416597 | 1.061986  | -3.017091 |
| C | -2.408712 | 0.158218  | -2.605925 |
| C | -3.188909 | 0.459328  | -1.432649 |
| C | -3.188909 | 0.459328  | 1.432649  |
| C | -3.427159 | -0.772774 | 0.698452  |
| C | -3.427159 | -0.772774 | -0.698452 |
| C | -2.772748 | -1.846639 | -1.427216 |
| C | -2.138533 | -1.268606 | -2.603002 |
| C | -0.901067 | -1.750409 | -3.032705 |
| C | 0.124168  | -0.818265 | -3.472870 |
| C | 1.414477  | -1.323550 | -3.026408 |
| C | 2.406560  | -0.437732 | -2.600656 |
| C | 2.115132  | 2.578600  | 0.726386  |
| C | 3.429934  | 0.484919  | -0.696365 |
| C | -1.894269 | 2.530191  | -1.136309 |
| C | 0.052879  | 3.679838  | 0.000000  |
| N | -1.331155 | 3.146329  | 0.000000  |

|                                       |   |           |          |           |
|---------------------------------------|---|-----------|----------|-----------|
|                                       | O | -0.090428 | 5.090277 | 0.000000  |
|                                       | H | 0.798822  | 5.474122 | 0.000000  |
| C <sub>59</sub> N-O-C <sub>59</sub> N | C | -1.175591 | 6.880127 | -2.732438 |
|                                       | C | -0.726916 | 5.680890 | -3.417827 |
|                                       | C | -1.424775 | 4.482457 | -3.255395 |
|                                       | C | -2.600919 | 4.436087 | -2.401443 |
|                                       | C | -3.026792 | 5.589250 | -1.739096 |
|                                       | C | -2.305003 | 6.835122 | -1.911807 |
|                                       | C | 0.000000  | 7.623617 | -2.312345 |
|                                       | C | 1.175591  | 6.880127 | -2.732438 |
|                                       | C | 0.726916  | 5.680890 | -3.417827 |
|                                       | C | 1.424775  | 4.482457 | -3.255395 |
|                                       | C | -0.696311 | 3.238491 | -3.081105 |
|                                       | C | -2.596447 | 3.164490 | -1.702660 |
|                                       | C | -3.018696 | 3.094745 | -0.372476 |
|                                       | C | -3.465685 | 4.291057 | 0.314281  |
|                                       | C | -3.472988 | 5.515681 | -0.355341 |
|                                       | C | -3.032928 | 6.723288 | 0.323991  |
|                                       | C | -2.304349 | 7.533240 | -0.635194 |
|                                       | C | -1.175717 | 8.249838 | -0.233680 |
|                                       | C | 0.000000  | 8.290994 | -1.086529 |
|                                       | C | 2.305003  | 6.835122 | -1.911807 |
|                                       | C | 2.304349  | 7.533240 | -0.635194 |
|                                       | C | 1.175717  | 8.249838 | -0.233680 |
|                                       | C | 0.727497  | 8.181241 | 1.146390  |
|                                       | C | -0.727497 | 8.181241 | 1.146390  |
|                                       | C | -1.427483 | 7.404438 | 2.070026  |
|                                       | C | -2.603555 | 6.656131 | 1.650279  |
|                                       | C | -2.606556 | 5.386835 | 2.355787  |
|                                       | C | -3.018782 | 4.216456 | 1.699465  |
|                                       | C | -1.423704 | 2.428957 | -2.114333 |
|                                       | C | 1.188120  | 1.547211 | 0.183752  |
|                                       | C | 2.290101  | 2.277972 | 0.575590  |
|                                       | C | 2.304365  | 2.970736 | 1.865295  |
|                                       | C | 0.716944  | 4.151714 | 3.322140  |
|                                       | C | -0.716944 | 4.151714 | 3.322140  |
|                                       | C | -1.136552 | 2.976583 | 2.610939  |
|                                       | C | -2.304365 | 2.970736 | 1.865295  |
|                                       | C | -2.290101 | 2.277972 | 0.575590  |
|                                       | C | -1.188120 | 1.547211 | 0.183752  |
|                                       | C | 0.725105  | 1.667664 | -1.173170 |
|                                       | C | 1.423704  | 2.428957 | -2.114333 |
|                                       | C | 2.596447  | 3.164490 | -1.702660 |
|                                       | C | 3.018696  | 3.094745 | -0.372476 |
|                                       | C | 3.465685  | 4.291057 | 0.314281  |
|                                       | C | 3.018782  | 4.216456 | 1.699465  |
|                                       | C | 2.606556  | 5.386835 | 2.355787  |
|                                       | C | 1.432952  | 5.347523 | 3.191140  |
|                                       | C | -1.432952 | 5.347523 | 3.191140  |
|                                       | C | -0.698582 | 6.591621 | 3.029281  |
|                                       | C | 0.698582  | 6.591621 | 3.029281  |
|                                       | C | 1.427483  | 7.404438 | 2.070026  |
|                                       | C | 2.603555  | 6.656131 | 1.650279  |
|                                       | C | 3.032928  | 6.723288 | 0.323991  |
|                                       | C | 3.472988  | 5.515681 | -0.355341 |
|                                       | C | 3.026792  | 5.589250 | -1.739096 |
|                                       | C | 2.600919  | 4.436087 | -2.401443 |

|   |           |           |           |
|---|-----------|-----------|-----------|
| C | 0.696311  | 3.238491  | -3.081105 |
| C | 1.136552  | 2.976583  | 2.610939  |
| C | -1.188120 | -1.547211 | 0.183752  |
| C | 1.188120  | -1.547211 | 0.183752  |
| C | -2.290101 | -2.277972 | 0.575590  |
| C | -0.725105 | -1.667664 | -1.173170 |
| C | -1.136552 | -2.976583 | 2.610939  |
| C | 1.136552  | -2.976583 | 2.610939  |
| C | 2.290101  | -2.277972 | 0.575590  |
| C | -2.304365 | -2.970736 | 1.865295  |
| C | -3.018696 | -3.094745 | -0.372476 |
| C | -1.423704 | -2.428957 | -2.114333 |
| C | -0.716944 | -4.151714 | 3.322140  |
| C | 0.716944  | -4.151714 | 3.322140  |
| C | 2.304365  | -2.970736 | 1.865295  |
| C | 1.423704  | -2.428957 | -2.114333 |
| C | 3.018696  | -3.094745 | -0.372476 |
| C | -3.018782 | -4.216456 | 1.699465  |
| C | -3.465685 | -4.291057 | 0.314281  |
| C | -2.596447 | -3.164490 | -1.702660 |
| C | -0.696311 | -3.238491 | -3.081105 |
| C | -1.432952 | -5.347523 | 3.191140  |
| C | 1.432952  | -5.347523 | 3.191140  |
| C | 3.018782  | -4.216456 | 1.699465  |
| C | 2.596447  | -3.164490 | -1.702660 |
| C | 0.696311  | -3.238491 | -3.081105 |
| C | 3.465685  | -4.291057 | 0.314281  |
| C | -2.606556 | -5.386835 | 2.355787  |
| C | -3.472988 | -5.515681 | -0.355341 |
| C | -2.600919 | -4.436087 | -2.401443 |
| C | -1.424775 | -4.482457 | -3.255395 |
| C | -0.698582 | -6.591621 | 3.029281  |
| C | 2.606556  | -5.386835 | 2.355787  |
| C | 0.698582  | -6.591621 | 3.029281  |
| C | 2.600919  | -4.436087 | -2.401443 |
| C | 1.424775  | -4.482457 | -3.255395 |
| C | 3.472988  | -5.515681 | -0.355341 |
| C | -2.603555 | -6.656131 | 1.650279  |
| C | -3.032928 | -6.723288 | 0.323991  |
| C | -3.026792 | -5.589250 | -1.739096 |
| C | -0.726916 | -5.680890 | -3.417827 |
| C | -1.427483 | -7.404438 | 2.070026  |
| C | 2.603555  | -6.656131 | 1.650279  |
| C | 1.427483  | -7.404438 | 2.070026  |
| C | 3.026792  | -5.589250 | -1.739096 |
| C | 0.726916  | -5.680890 | -3.417827 |
| C | 3.032928  | -6.723288 | 0.323991  |
| C | -2.304349 | -7.533240 | -0.635194 |
| C | -2.305003 | -6.835122 | -1.911807 |
| C | -1.175591 | -6.880127 | -2.732438 |
| C | -0.727497 | -8.181241 | 1.146390  |
| C | 0.727497  | -8.181241 | 1.146390  |
| C | 2.305003  | -6.835122 | -1.911807 |
| C | 1.175591  | -6.880127 | -2.732438 |
| C | 2.304349  | -7.533240 | -0.635194 |
| C | -1.175717 | -8.249838 | -0.233680 |
| C | 0.000000  | -7.623617 | -2.312345 |

---

|   |           |           |           |
|---|-----------|-----------|-----------|
| C | 1.175717  | -8.249838 | -0.233680 |
| C | 0.000000  | -8.290994 | -1.086529 |
| C | 0.725105  | -1.667664 | -1.173170 |
| C | -0.725105 | 1.667664  | -1.173170 |
| C | 0.000000  | -1.262251 | 1.129499  |
| C | 0.000000  | 1.262251  | 1.129499  |
| N | 0.000000  | 2.221743  | 2.262717  |
| N | 0.000000  | -2.221743 | 2.262717  |
| O | 0.000000  | 0.000000  | 1.807137  |

---
